# Supplementary material for: Epidemiology of facial fractures: incidence, prevalence and years lived with disability estimates from the Global Burden of Disease 2017 study
Source: Inj Prev. 2020 Jan 8;26(Suppl 1):i27–35. doi: 10.1136/injuryprev-2019-043297 (PMC7571355; doi:10.1136/injuryprev-2019-043297)
Supplement: Supplementary data [file injuryprev-2019-043297supp003.pdf]

| Table 1: Incidence, prevalence, and YLDs for 2017 and percentage change of age-standardised rates by location for facial fractures |                                       |                                         |                                                                   |                                       |                                         |                                                                   |                                |                                         |                                                                   |  |  |  |
|------------------------------------------------------------------------------------------------------------------------------------|---------------------------------------|-----------------------------------------|-------------------------------------------------------------------|---------------------------------------|-----------------------------------------|-------------------------------------------------------------------|--------------------------------|-----------------------------------------|-------------------------------------------------------------------|--|--|--|
| Location                                                                                                                           | Incidence (95% UI)                    |                                         |                                                                   |                                       | Prevalence (95% UI)                     |                                                                   |                                |                                         | YLDs (95% UI)                                                     |  |  |  |
|                                                                                                                                    | 2017 counts                           | 2017 age-standardised rates per 100,000 | Percentage change in age-standardised rates between 1990 and 2017 | 2017 counts                           | 2017 age-standardised rates per 100,000 | Percentage change in age-standardised rates between 1990 and 2017 | 2017 counts                    | 2017 age-standardised rates per 100,000 | Percentage change in age-standardised rates between 1990 and 2017 |  |  |  |
| Global                                                                                                                             | 7 538 663<br>(6 114 489 to 9 493 113) | 98<br>(80 to 123)                       | -2.0<br>(-3.0 to 1.1)                                             | 1 819 732<br>(1 609 415 to 2 091 618) | 23<br>(20 to 27)                        | -2.8<br>(-4.1 to -1.4)                                            | 117 402<br>(72 246 to 169 895) | 1<br>(1 to 2)                           | -2.7<br>(-3.9 to -1.5)                                            |  |  |  |
| Low SDI                                                                                                                            | 1 089 162<br>(886 300 to 1 327 015)   | 84<br>(70 to 101)                       | -0.3<br>(-0.2 to -0.3)                                            | 219 795<br>(184 916 to 270 384)       | 21<br>(18 to 25)                        | -1.4<br>(-1.2 to -0.6)                                            | 14 282<br>(9 008 to 20 455)    | 2<br>(1 to 2)                           | -2.4<br>(-2.7 to -2.5)                                            |  |  |  |
| Low-middle SDI                                                                                                                     | 1 456 718<br>(1 200 207 to 1 777 972) | 104<br>(87 to 124)                      | 17.3<br>(14.0 to 21.6)                                            | 300 831<br>(259 456 to 352 338)       | 19<br>(17 to 23)                        | 15.7<br>(12.0 to 18.0)                                            | 19 567<br>(12 116 to 28 935)   | 1<br>(1 to 2)                           | 15.2<br>(12.1 to 19.2)                                            |  |  |  |
| Middle SDI                                                                                                                         | 1 511 639<br>(1 213 269 to 1 875 589) | 121<br>(99 to 147)                      | 24.3<br>(18.8 to 30.8)                                            | 364 245<br>(322 625 to 418 366)       | 17<br>(15 to 19)                        | 22.4<br>(19.2 to 26.5)                                            | 23 693<br>(14 840 to 34 586)   | 2<br>(1 to 2)                           | 22.2<br>(18.3 to 26.9)                                            |  |  |  |
| High-middle SDI                                                                                                                    | 1 749 211<br>(1 388 163 to 2 235 915) | 128<br>(102 to 164)                     | 0.4<br>(-2.6 to 3.5)                                              | 453 558<br>(402 094 to 517 635)       | 29<br>(26 to 34)                        | -3.1<br>(-4.6 to -1.5)                                            | 29 163<br>(18 075 to 42 458)   | 2<br>(1 to 2)                           | -3.8<br>(-5.2 to -2.2)                                            |  |  |  |
| High SDI                                                                                                                           | 1 709 494<br>(1 307 361 to 2 264 741) | 158<br>(124 to 206)                     | -0.8<br>(-1.4 to -0.1)                                            | 475 199<br>(420 105 to 544 481)       | 35<br>(30 to 41)                        | -0.6<br>(-1.0 to -0.4)                                            | 30 132<br>(18 841 to 44 541)   | 2<br>(1 to 2)                           | -0.7<br>(-1.7 to 0.2)                                             |  |  |  |
| Central Europe, Eastern Europe, and Central Asia                                                                                   | 1 024 479<br>(774 842 to 1 360 176)   | 234<br>(193 to 335)                     | 4.4<br>(2.2 to 6.5)                                               | 248 683<br>(232 728 to 268 899)       | 56<br>(48 to 67)                        | -4.5<br>(-6.1 to -3.1)                                            | 16 947<br>(10 461 to 24 821)   | 4<br>(2 to 5)                           | -4.9<br>(-7.3 to -2.4)                                            |  |  |  |
| Central Asia                                                                                                                       | 154 199<br>(120 340 to 199 933)       | 167<br>(130 to 217)                     | 3.4<br>(-2.5 to 8.6)                                              | 33 550<br>(28 826 to 39 751)          | 38<br>(33 to 44)                        | -2.5<br>(-5.1 to 0.9)                                             | 2 176<br>(1 332 to 3 192)      | 2<br>(1 to 4)                           | 2.3<br>(-2.6 to 8.3)                                              |  |  |  |
| Armenia                                                                                                                            | 4734<br>(3 647 to 6 235)              | 161<br>(125 to 214)                     | -27.7<br>(-32.5 to -15.6)                                         | 1 135<br>(1 072 to 1 435)             | 17<br>(12 to 44)                        | -21.7<br>(-27.7 to -17.5)                                         | 79<br>(49 to 117)              | 2<br>(1 to 4)                           | -21.8<br>(-31.6 to -11.6)                                         |  |  |  |
| Azerbaijan                                                                                                                         | 17 127<br>(13 273 to 22 375)          | 166<br>(128 to 215)                     | 0.4<br>(-7.9 to 7.3)                                              | 2 964<br>(3 427 to 4 683)             | 2<br>(1 to 45)                          | -8.6<br>(-0.8 to 12.2)                                            | 256<br>(162 to 377)            | 2<br>(2 to 4)                           | -8.6<br>(-6.9 to 18.1)                                            |  |  |  |
| Georgia                                                                                                                            | 6 094<br>(4 723 to 7 907)             | 171<br>(132 to 220)                     | -3.9<br>(-10.3 to 9)                                              | 1 627<br>(1 435 to 1 873)             | 38<br>(33 to 45)                        | -2.1<br>(-6.2 to 9)                                               | 104<br>(63 to 152)             | 2<br>(2 to 4)                           | -2.4<br>(-11.3 to 6)                                              |  |  |  |
| Kazakhstan                                                                                                                         | 34 224<br>(26 818 to 43 235)          | 151<br>(119 to 246)                     | 0.3<br>(-7.0 to 7.6)                                              | 5 567<br>(6 554 to 8 897)             | 42<br>(36 to 49)                        | -2.5<br>(-5.7 to 0.1)                                             | 485<br>(300 to 730)            | 2<br>(2 to 4)                           | -2.7<br>(-12.2 to 6)                                              |  |  |  |
| Kyrgyzstan                                                                                                                         | 9 811<br>(7 635 to 12 776)            | 150<br>(117 to 198)                     | -0.5<br>(-25.1 to -14.3)                                          | 1 000<br>(1 718 to 2 414)             | 34<br>(29 to 40)                        | -18.6<br>(-21.8 to -15.7)                                         | 132<br>(78 to 199)             | 2<br>(2 to 4)                           | -18.4<br>(-27.4 to -8.1)                                          |  |  |  |
| Mongolia                                                                                                                           | 6 448<br>(5 173 to 8 565)             | 258<br>(154 to 260)                     | 17.3<br>(12.9 to 21.9)                                            | 1 897<br>(1 197 to 1 654)             | 39<br>(38 to 42)                        | 13.5<br>(10.7 to 16.9)                                            | 44<br>(35 to 136)              | 2<br>(2 to 4)                           | 14.5<br>(2.6 to 27.6)                                             |  |  |  |
| Tajikistan                                                                                                                         | 14 906<br>(1 438 to 19 339)           | 156<br>(18 to 203)                      | 4.1<br>(-2.1 to 10.3)                                             | 3 189<br>(2 646 to 3 950)             | 39<br>(32 to 47)                        | 5.4<br>(-3.3 to 16.3)                                             | 207<br>(118 to 309)            | 2<br>(2 to 4)                           | 4.9<br>(-6.7 to 20)                                               |  |  |  |
| Turkmenistan                                                                                                                       | 8 405<br>(6 489 to 10 855)            | 166<br>(128 to 218)                     | 0.3<br>(-6.1 to 15.0)                                             | 1 772<br>(1 320 to 1 504)             | 37<br>(31 to 43)                        | -7.2<br>(-13.9 to 7)                                              | 111<br>(72 to 173)             | 2<br>(2 to 4)                           | -7.2<br>(-14.9 to 10)                                             |  |  |  |
| Uzbekistan                                                                                                                         | 52 136<br>(40 394 to 67 877)          | 157<br>(122 to 204)                     | 2.8<br>(2.1 to 21.7)                                              | 10 777<br>(9 222 to 12 843)           | 34<br>(30 to 43)                        | 2.8<br>(-0.1 to 5.7)                                              | 702<br>(421 to 1 047)          | 2<br>(1 to 3)                           | 2.8<br>(-1.4 to 14.3)                                             |  |  |  |
| Central Europe                                                                                                                     | 337 810<br>(245 337 to 466 014)       | 310<br>(238 to 420)                     | 1.8<br>(-6.0 to 9.1)                                              | 92 387<br>(80 142 to 108 397)         | 68<br>(52 to 82)                        | -2.8<br>(-5.2 to -0.5)                                            | 5 861<br>(3 762 to 8 594)      | 2<br>(2 to 4)                           | -2.8<br>(-6.8 to 9)                                               |  |  |  |
| Albania                                                                                                                            | 7 390<br>(5 473 to 9 981)             | 281<br>(210 to 377)                     | 10.1<br>(-2.4 to 23.3)                                            | 1 897<br>(1 649 to 2 240)             | 122<br>(102 to 142)                     | 6.5<br>(-4.8 to 17.5)                                             | 122<br>(74 to 182)             | 4<br>(2 to 6)                           | 9.5<br>(-1.2 to 20.8)                                             |  |  |  |
| Bosnia and Herzegovina                                                                                                             | 8 912<br>(6 479 to 12 000)            | 286<br>(211 to 386)                     | -25.5<br>(-25.0 to -34.4)                                         | 2 686<br>(2 294 to 3 257)             | 68<br>(57 to 83)                        | 38.7<br>(29.0 to 60.4)                                            | 170<br>(108 to 242)            | 2<br>(2 to 6)                           | 38.1<br>(22.7 to 65.3)                                            |  |  |  |
| Bulgaria                                                                                                                           | 18 901<br>(13 796 to 25 776)          | 295<br>(218 to 396)                     | -4.2<br>(-10.3 to 1.9)                                            | 5 452<br>(4 777 to 6 356)             | 64<br>(54 to 77)                        | -45.2<br>(-7.4 to 0.5)                                            | 346<br>(214 to 514)            | 2<br>(2 to 6)                           | -45.2<br>(-12.0 to 43)                                            |  |  |  |
| Croatia                                                                                                                            | 10 801<br>(7 838 to 14 842)           | 248<br>(187 to 331)                     | -16.5<br>(-27.7 to -10.4)                                         | 2 488<br>(2 630 to 3 542)             | 55<br>(47 to 66)                        | -13.1<br>(-17.6 to -8.6)                                          | 191<br>(118 to 282)            | 2<br>(2 to 5)                           | -13.5<br>(-14.0 to -4.5)                                          |  |  |  |
| Czech Republic                                                                                                                     | 36 609<br>(26 369 to 49 591)          | 374<br>(275 to 500)                     | 4.2<br>(-1.5 to 11.1)                                             | 10 166<br>(8 737 to 12 000)           | 38<br>(30 to 49)                        | 3.8<br>(-0.1 to 8.2)                                              | 642<br>(392 to 958)            | 5<br>(4 to 8)                           | 3.8<br>(-1.3 to 14.1)                                             |  |  |  |
| Hungary                                                                                                                            | 28 111<br>(20 202 to 39 443)          | 303<br>(220 to 413)                     | -10.3<br>(-16.1 to -4.1)                                          | 7 785<br>(6 705 to 9 226)             | 103<br>(95 to 100)                      | -12.2<br>(-15.8 to -8.5)                                          | 491<br>(298 to 742)            | 6<br>(4 to 8)                           | -10.3<br>(-19.0 to -1)                                            |  |  |  |
| Macedonia                                                                                                                          | 6 498<br>(4 107 to 9 831)             | 282<br>(197 to 382)                     | 10.2<br>(6.0 to 18.0)                                             | 1 500<br>(1 300 to 1 772)             | 42<br>(32 to 73)                        | 12.4<br>(7.7 to 16.8)                                             | 96<br>(68 to 144)              | 2<br>(2 to 6)                           | 12.3<br>(-1.5 to 23.2)                                            |  |  |  |
| Montenegro                                                                                                                         | 1 759<br>(1 300 to 2 362)             | 29<br>(22 to 40)                        | 3.6<br>(-2.0 to 9.0)                                              | 435<br>(394 to 533)                   | 25<br>(15 to 78)                        | 45<br>(1.0 to 8.4)                                                | 29<br>(18 to 43)               | 2<br>(2 to 6)                           | 4.3<br>(-5.2 to 14.3)                                             |  |  |  |
| Poland                                                                                                                             | 116 518<br>(84 517 to 161 203)        | 316<br>(233 to 427)                     | 1.5<br>(-3.5 to 6.9)                                              | 31 345<br>(27 099 to 36 955)          | 33<br>(28 to 39)                        | 0.4<br>(-3.7 to 4.5)                                              | 1 991<br>(1 228 to 2 954)      | 4<br>(3 to 7)                           | 0.2<br>(-8.2 to 8.6)                                              |  |  |  |
| Romania                                                                                                                            | 55 344<br>(40 328 to 75 628)          | 304<br>(230 to 407)                     | 12.4<br>(-1.8 to 4.4)                                             | 15 183<br>(13 164 to 17 819)          | 30<br>(25 to 39)                        | -14.4<br>(-17.2 to -10.5)                                         | 96<br>(58 to 148)              | 2<br>(2 to 6)                           | 9.6<br>(-1.5 to 21.1)                                             |  |  |  |
| Serbia                                                                                                                             | 23 251<br>(17 109 to 31 741)          | 284<br>(210 to 383)                     | -20.5<br>(-4.2 to 15.9)                                           | 2 997<br>(5 559 to 7 558)             | 40<br>(34 to 76)                        | -20.5<br>(-9.8 to 15.0)                                           | 409<br>(249 to 594)            | 4<br>(3 to 7)                           | -20.5<br>(-15.2 to 14.3)                                          |  |  |  |
| Slovakia                                                                                                                           | 16 811<br>(12 185 to 23 128)          | 320<br>(218 to 430)                     | 7.0<br>(-11.8 to -2.4)                                            | 4 401<br>(3 788 to 5 199)             | 45<br>(38 to 84)                        | 8.5<br>(-11.4 to 5.5)                                             | 280<br>(168 to 417)            | 2<br>(2 to 7)                           | 8.2<br>(-15.3 to 6.2)                                             |  |  |  |
| Slovenia                                                                                                                           | 7 634<br>(5 415 to 10 422)            | 376<br>(276 to 507)                     | -0.3<br>(-5.4 to 6.0)                                             | 2 105<br>(1 829 to 2 484)             | 81<br>(69 to 99)                        | -0.8<br>(-4.2 to 3.0)                                             | 133<br>(81 to 199)             | 5<br>(2 to 8)                           | -0.6<br>(-6.8 to 0.9)                                             |  |  |  |
| Eastern Europe                                                                                                                     | 23 513<br>(17 816 to 30 276)          | 239<br>(205 to 351)                     | 1.0<br>(-6.2 to 1.0)                                              | 154<br>(132 815 to 181 152)           | 18<br>(10 to 69)                        | 0.7<br>(-3.1 to 0.4)                                              | 195<br>(126 to 319)            | 2<br>(2 to 6)                           | 0.7<br>(-5.6 to 7.0)                                              |  |  |  |
| Belarus                                                                                                                            | 23 513<br>(17 816 to 30 276)          | 239<br>(205 to 351)                     | 1.0<br>(-6.2 to 1.0)                                              | 154<br>(132 815 to 181 152)           | 18<br>(10 to 69)                        | 0.7<br>(-3.1 to 0.4)                                              | 195<br>(126 to 319)            | 2<br>(2 to 6)                           | 0.7<br>(-5.6 to 7.0)                                              |  |  |  |
| Estonia                                                                                                                            | 3 101<br>(2 337 to 4 110)             | 257<br>(195 to 338)                     | -16.9<br>(-35.0 to 3.1)                                           | 802<br>(748 to 951)                   | 55<br>(47 to 66)                        | -17.3<br>(-20.3 to -14.1)                                         | 54<br>(31 to 81)               | 2<br>(2 to 5)                           | -17.1<br>(-22.4 to -11.7)                                         |  |  |  |
| Latvia                                                                                                                             | 4 778<br>(3 812 to 5 856)             | 263<br>(199 to 348)                     | -17.1<br>(-39.9 to 34.6)                                          | 1 324<br>(1 164 to 1 528)             | 56<br>(48 to 67)                        | -18.4<br>(-21.3 to -15.3)                                         | 4<br>(2 to 13)                 | 4<br>(2 to 4)                           | -18.2<br>(-24.9 to -11.3)                                         |  |  |  |
| Lithuania                                                                                                                          | 7 612<br>(5 696 to 10 252)            | 262<br>(193 to 362)                     | -2.2<br>(-11.0 to 6.1)                                            | 2 091<br>(1 826 to 2 431)             | 37<br>(31 to 73)                        | -7.0<br>(-9.9 to 3.8)                                             | 132<br>(87 to 144)             | 2<br>(2 to 6)                           | -7.0<br>(-14.8 to 0.1)                                            |  |  |  |
| Moldova                                                                                                                            | 7 737<br>(5 897 to 10 158)            | 234<br>(170 to 293)                     | -12.7<br>(-17.6 to -7.3)                                          | 2 092<br>(1 772 to 2 363)             | 49<br>(42 to 58)                        | -12.7<br>(-16.8 to -10.4)                                         | 139<br>(80 to 193)             | 2<br>(2 to 5)                           | -12.7<br>(-22.2 to -4.3)                                          |  |  |  |
| Russian Federation                                                                                                                 | 377 124<br>(289 211 to 496 594)       | 271<br>(207 to 354)                     | 3.2<br>(-7.3 to 13.1)                                             | 99 094<br>(86 139 to 113 401)         | 59<br>(50 to 70)                        | -2.8<br>(-5.2 to -0.4)                                            | 6 259<br>(3 864 to 11 877)     | 2<br>(2 to 6)                           | 2.8<br>(-6.1 to 15.5)                                             |  |  |  |
| Ukraine                                                                                                                            | 108 465<br>(83 222 to 142 077)        | 264<br>(202 to 346)                     | 2.0<br>(-2.2 to 6.4)                                              | 29 173<br>(25 707 to 33 553)          | 57<br>(49 to 68)                        | 1.2<br>(-1.6 to 4.1)                                              | 1 856<br>(1 138 to 2 740)      | 4<br>(3 to 7)                           | 1.2<br>(-7.2 to 9.6)                                              |  |  |  |
| High-income                                                                                                                        | 1 530 492<br>(1 180 645 to 2 013 770) | 190<br>(157 to 195)                     | -0.8<br>(-3.0 to 1.5)                                             | 429 726<br>(373 075 to 486 966)       | 38<br>(33 to 43)                        | -0.4<br>(-1.6 to 0.9)                                             | 26 078<br>(16 711 to 39 478)   | 2<br>(1 to 3)                           | -0.8<br>(-2.6 to 0.4)                                             |  |  |  |
| Australia                                                                                                                          | 77 135<br>(58 731 to 101 370)         | 127<br>(92 to 181)                      | -0.1<br>(-6.4 to 14.7)                                            | 22 822<br>(17 023 to 22 762)          | 42<br>(33 to 73)                        | -0.1<br>(-6.4 to 14.7)                                            | 42<br>(27 to 128)              | 2<br>(2 to 6)                           | -0.1<br>(-4.5 to 18.6)                                            |  |  |  |
| Australia                                                                                                                          | 62 547<br>(47 552 to 82 703)          | 101<br>(70 to 165)                      | -10.1<br>(-20.5 to 15.1)                                          | 15 858<br>(13 802 to 18 496)          | 10<br>(8 to 13)                         | -7.0<br>(-10.3 to 3.3)                                            | 7<br>(4 to 13)                 | 2<br>(2 to 6)                           | -7.7<br>(-15.8 to 7.4)                                            |  |  |  |
| New Zealand                                                                                                                        | 14 579<br>(11 142 to 19 137)          | 345<br>(246 to 449)                     | 11.8<br>(-6.2 to 18.3)                                            | 3 663<br>(3 195 to 4 278)             | 73<br>(63 to 87)                        | 10.0<br>(6.0 to 14.4)                                             | 234<br>(144 to 347)            | 5<br>(3 to 7)                           | 10.0<br>(-1.3 to 19.1)                                            |  |  |  |
| High-income Asia-Pacific                                                                                                           | 259 948<br>(194 962 to 350 170)       | 158<br>(119 to 214)                     | 0.7<br>(-0.3 to 0.8)                                              | 80 146<br>(70 927 to 92 929)          | 35<br>(30 to 42)                        | 0.7<br>(-3.9 to 5.7)                                              | 5 512<br>(3 201 to 7 511)      | 2<br>(2 to 6)                           | 0.7<br>(-2.1 to 3.5)                                              |  |  |  |
| Brunei                                                                                                                             | 412<br>(335 to 504)                   | 62<br>(49 to 104)                       | 6.2<br>(-4.9 to 15.4)                                             | 1 172<br>(1 048 to 2 04)              | 42<br>(35 to 48)                        | 6.2<br>(-6.0 to 0.4)                                              | 11<br>(7 to 17)                | 2<br>(2 to 4)                           | 6.2<br>(-13.1 to 8.2)                                             |  |  |  |
| Japan                                                                                                                              | 174 330<br>(126 198 to 241 955)       | 155<br>(119 to 215)                     | 16.7<br>(-2.4 to 20.6)                                            | 57 496<br>(50 718 to 66 017)          | 35<br>(30 to 42)                        | 16.7<br>(14.0 to 19.2)                                            | 3 653<br>(2 380 to 5 493)      | 2<br>(2 to 3)                           | 16.8<br>(15.6 to 17.8)                                            |  |  |  |
| South Korea                                                                                                                        | 79 005<br>(60 905 to 99 388)          | 190<br>(150 to 231)                     | -15.2<br>(-20.1 to -10.3)                                         | 20 334<br>(17 868 to 23 353)          | 30<br>(25 to 37)                        | -17.3<br>(-19.9 to -14.2)                                         | 1 717<br>(979 to 3 021)        | 2<br>(2 to 3)                           | -15.2<br>(-20.5 to -7.4)                                          |  |  |  |
| Singapore                                                                                                                          | 15 578<br>(6 664 to 11 129)           | 103<br>(66 to 147)                      | -15.7<br>(-21.6 to -9.8)                                          | 2 144<br>(1 871 to 2 488)             | 30<br>(25 to 37)                        | -14.4<br>(-18.5 to 0.7)                                           | 336<br>(185 to 607)            | 2<br>(2 to 4)                           | -15.7<br>(-21.6 to -9.8)                                          |  |  |  |
| High-income North America                                                                                                          | 441 467<br>(361 681 to 545 456)       | 131<br>(106 to 179)                     | -30.6<br>(-24.2 to -37.1)                                         | 132 599<br>(117 213 to 151 321)       | 31<br>(26 to 37)                        | -29.2<br>(-23.9 to -37.0)                                         | 8 451<br>(5 289 to 13 873)     | 2<br>(2 to 3)                           | -29.4<br>(-26.0 to -33.3)                                         |  |  |  |
| Canada                                                                                                                             | 49 267<br>(38 614 to 63 397)          | 143<br>(111 to 181)                     | -0.5<br>(-2.4 to 1.3)                                             | 13 435<br>(11 301 to 15 335)          | 31<br>(27 to 36)                        | -3.1<br>(-3.4 to -2.1)                                            | 863<br>(519 to 2 699)          | 2<br>(2 to 3)                           | -1.0<br>(-1.0 to 9.2)                                             |  |  |  |
| Greenland                                                                                                                          | 88 to 132                             | 87<br>(68 to 112)                       | 31.2<br>(-36.0 to 30.3)                                           | 154<br>(18 to 24)                     | 34<br>(30 to 40)                        | 1.1<br>(-6.6 to 3.8)                                              | 1<br>(1 to 7)                  | 1<br>(1 to 3)                           | 31.2<br>(-31.2 to 77.4)                                           |  |  |  |
| USA                                                                                                                                | 432 004<br>(327 523 to 76 650)        | 138<br>(99 to 170)                      | -0.8<br>(-3.1 to 1.5)                                             | 139 141<br>(105 134 to 176 479)       | 32<br>(27 to 35)                        | -0.8<br>(-3.0 to -2.7)                                            |                                |                                         |                                                                   |  |  |  |

| Location                         | Incidence (95% UI)     |                                         |                                                                   | Prevalence (95% UI)  |                                         |                                                                   | YLDs (95% UI)     |                                         |                                                                   |
|----------------------------------|------------------------|-----------------------------------------|-------------------------------------------------------------------|----------------------|-----------------------------------------|-------------------------------------------------------------------|-------------------|-----------------------------------------|-------------------------------------------------------------------|
|                                  | 2017 counts            | 2017 age-standardised rates per 100,000 | Percentage change in age-standardised rates between 1990 and 2017 | 2017 counts          | 2017 age-standardised rates per 100,000 | Percentage change in age-standardised rates between 1990 and 2017 | 2017 counts       | 2017 age-standardised rates per 100,000 | Percentage change in age-standardised rates between 1990 and 2017 |
| United Kingdom                   | 95 135                 | 156                                     | 8.7                                                               | 24 606               | 33                                      | 9.1                                                               | 1 575             | 2                                       | 9.0                                                               |
| Latin America and Caribbean      | (72 235 to 125 133)    | (120 to 203)                            | (5.9 to 11.5)                                                     | (21 455 to 28 573)   | (28 to 39)                              | (7.1 to 11.0)                                                     | (873 to 107)      | 1                                       | (5.7 to 11.8)                                                     |
| Andean Latin America             | 608 817                | 64                                      | 9.3                                                               | 94 277               | 16                                      | 43.2                                                              | 4319              | 1                                       | 39.1                                                              |
| Bolivia                          | (812 608 to 935 700)   | (54 to 92)                              | (0.7 to 17.5)                                                     | (81 844 to 111 340)  | (14 to 19)                              | (3.9 to 15.4)                                                     | (8 801 to 9 193)  | 1                                       | (0.4 to 16.3)                                                     |
| Brazil                           | 45 54                  | 62                                      | 14.4                                                              | 4 463                | 7                                       | 46.3                                                              | 64                | 1                                       | 55.1                                                              |
| Colombia                         | (80 281 to 48 250)     | (50 to 79)                              | (139.3 to 3.9)                                                    | (7 330 to 9 954)     | (12 to 17)                              | (21.6 to 4.2)                                                     | (341 to 805)      | 1                                       | (23.4 to 7.9)                                                     |
| Ecuador                          | 6615                   | 59                                      | 3.8                                                               | 1 357                | 13                                      | 1.8                                                               | 89                | 1                                       | 1.7                                                               |
| Peru                             | (5 232 to 8 393)       | (46 to 74)                              | (1.8 to 9.0)                                                      | (1 167 to 1 596)     | (12 to 15)                              | (0.9 to 4.8)                                                      | (202 to 320)      | 1                                       | (1.8 to 14.4)                                                     |
| Paraguay                         | 11 444                 | 69                                      | 14.7                                                              | 2 471                | 15                                      | 9.5                                                               | 161               | 1                                       | 9.8                                                               |
| Uruguay                          | (9 107 to 14 542)      | (51 to 88)                              | (0.0 to 19.6)                                                     | (2 133 to 2 901)     | (13 to 18)                              | (5.6 to 12.9)                                                     | (100 to 238)      | 1                                       | (4.0 to 24.2)                                                     |
| Venezuela                        | 20 341                 | 61                                      | 28.1                                                              | 4 635                | 14                                      | 30.2                                                              | 302               | 1                                       | 14.6                                                              |
| Caribbean                        | (15 991 to 25 494)     | (48 to 77)                              | (55.5 to 2.1)                                                     | (1 954 to 5 541)     | (12 to 17)                              | (34.4 to 1.9)                                                     | (185 to 440)      | 1                                       | (36.2 to 7.6)                                                     |
| Antigua and Barbuda              | 38 496                 | 72                                      | 36.3                                                              | 8 430                | 18                                      | 36.7                                                              | 543               | 1                                       | 48.8                                                              |
| Barbados                         | (26 883 to 41 446)     | (18 to 30)                              | (9.5 to 52.0)                                                     | (6 582 to 10 524)    | (14 to 22)                              | (37.0 to 64.0)                                                    | (344 to 792)      | 1                                       | (79.8 to 84.3)                                                    |
| Belize                           | 59                     | 68                                      | 32.1                                                              | 14                   | 1                                       | 27.6                                                              | 1                 | 1                                       | 27.3                                                              |
| The Bahamas                      | (17 to 75)             | (15 to 87)                              | (27.2 to 38.1)                                                    | (12 to 16)           | (11 to 17)                              | (24.1 to 31.2)                                                    | (1 to 1)          | 1                                       | (11.6 to 42.9)                                                    |
| Barbados                         | 245                    | 67                                      | 28.1                                                              | 55                   | 14                                      | 25.8                                                              | 4                 | 1                                       | 25.4                                                              |
| Belize                           | (188 to 306)           | (54 to 83)                              | (23.4 to 33.2)                                                    | (48 to 63)           | (12 to 17)                              | (22.7 to 29.3)                                                    | (2 to 5)          | 1                                       | (11.1 to 42.0)                                                    |
| Bermuda                          | 179                    | 63                                      | 35.1                                                              | 45                   | 13                                      | 46.7                                                              | 1                 | 1                                       | 45.5                                                              |
| Bonaire                          | (147 to 226)           | (50 to 78)                              | (29.6 to 38.6)                                                    | (40 to 52)           | (11 to 15)                              | (29.2 to 34.8)                                                    | (2 to 4)          | 1                                       | (17.2 to 47.6)                                                    |
| Curaçao                          | 269                    | 69                                      | 45.8                                                              | 56                   | 16                                      | 46.7                                                              | 4                 | 1                                       | 45.5                                                              |
| Dominican Republic               | (219 to 335)           | (56 to 86)                              | (38.1 to 49.3)                                                    | (48 to 65)           | (14 to 18)                              | (41.7 to 54.5)                                                    | (2 to 5)          | 1                                       | (27.4 to 67.5)                                                    |
| Jamaica                          | 44                     | 68                                      | 27.0                                                              | 12                   | 15                                      | 20.8                                                              | 1                 | 1                                       | 21.1                                                              |
| Puerto Rico                      | (34 to 56)             | (24 to 36)                              | (22.1 to 32.6)                                                    | (11 to 16)           | (13 to 17)                              | (13.5 to 25.3)                                                    | (0 to 2)          | 1                                       | (6.7 to 32.7)                                                     |
| Trinidad and Tobago              | 8317                   | 20                                      | 23.7                                                              | 2 032                | 15                                      | 20.7                                                              | 131               | 1                                       | 20.5                                                              |
| Cuba                             | (6 399 to 10 808)      | (51 to 90)                              | (8.9 to 30.0)                                                     | (1 776 to 2 372)     | (13 to 17)                              | (17.1 to 24.2)                                                    | (80 to 193)       | 1                                       | (7.0 to 35.4)                                                     |
| Dominican Republic               | 421                    | 41                                      | 41.8                                                              | 10                   | 13                                      | 41.2                                                              | 13                | 1                                       | 40.4                                                              |
| Dominican Republic               | (33 to 52)             | (49 to 76)                              | (9.0 to 46.5)                                                     | (9 to 12)            | (12 to 15)                              | (36.7 to 45.0)                                                    | (0 to 1)          | 1                                       | (23.5 to 59.6)                                                    |
| Dominican Republic               | 7444                   | 53                                      | 52.3                                                              | 1 617                | 16                                      | 48.7                                                              | 106               | 1                                       | 106                                                               |
| Dominican Republic               | (6 224 to 9 472)       | (40 to 91)                              | (46.4 to 10.3)                                                    | (1 405 to 1 873)     | (14 to 18)                              | (44.9 to 52.2)                                                    | (65 to 156)       | 1                                       | (79.4 to 67.6)                                                    |
| Grenada                          | 70                     | 63                                      | 31.9                                                              | 17                   | 29.7                                    | 1                                                                 | 1                 | 1                                       | 29.1                                                              |
| Grenada                          | (56 to 89)             | (51 to 80)                              | (27.4 to 38.7)                                                    | (13 to 19)           | (12 to 16)                              | (26.1 to 32.3)                                                    | (1 to 2)          | 1                                       | (15.3 to 65.1)                                                    |
| Guyana                           | 474                    | 84                                      | 11.1                                                              | 100                  | 7                                       | 34.7                                                              | 10                | 1                                       | 33.7                                                              |
| Guyana                           | (181 to 589)           | (52 to 81)                              | (29.6 to 39.7)                                                    | (37 to 117)          | (12 to 16)                              | (30.1 to 36.7)                                                    | (4 to 10)         | 1                                       | (17.5 to 48.9)                                                    |
| Haiti                            | 6116                   | 53                                      | 51.3                                                              | 2 168                | 24                                      | 109.7                                                             | 149               | 1                                       | 149                                                               |
| Haiti                            | (494 to 7567)          | (43 to 96)                              | (0.7 to 10.9)                                                     | (434 to 4 052)       | (13 to 43)                              | (29.8 to 261.4)                                                   | (85 to 264)       | 1                                       | (25.4 to 237.4)                                                   |
| Jamaica                          | 1 567                  | 147                                     | 49.8                                                              | 49                   | 15                                      | 48.8                                                              | 29                | 1                                       | 48.1                                                              |
| Jamaica                          | (1 592 to 2 492)       | (58 to 90)                              | (42.0 to 58.4)                                                    | (382 to 507)         | (13 to 18)                              | (43.8 to 53.8)                                                    | (18 to 42)        | 1                                       | (19.0 to 69.1)                                                    |
| Puerto Rico                      | 5245                   | 148                                     | 112.0                                                             | 985                  | 24                                      | 86.9                                                              | 64                | 2                                       | 88.4                                                              |
| Puerto Rico                      | (3 382 to 5 546)       | (84 to 143)                             | (71.4 to 37.1)                                                    | (777 to 1 360)       | (48 to 134)                             | (47.2 to 70.9)                                                    | (36 to 102)       | 1                                       | (41.4 to 100.0)                                                   |
| Saint Lucia                      | 109                    | 63                                      | 31.8                                                              | 25                   | 14                                      | 28.7                                                              | 1                 | 1                                       | 28.0                                                              |
| Saint Vincent and the Grenadines | (88 to 136)            | (51 to 79)                              | (27.3 to 36.5)                                                    | (22 to 29)           | (12 to 16)                              | (26.0 to 31.4)                                                    | (1 to 2)          | 1                                       | (23.3 to 65.3)                                                    |
| Suriname                         | 72                     | 60                                      | 40.0                                                              | 18                   | 15                                      | 44.3                                                              | 15                | 1                                       | 43.5                                                              |
| Suriname                         | (61 to 96)             | (40 to 59)                              | (46.0 to 50.9)                                                    | (16 to 21)           | (13 to 17)                              | (43.5 to 50.7)                                                    | (1 to 2)          | 1                                       | (29.4 to 63.3)                                                    |
| Suriname                         | 355                    | 64                                      | 34.0                                                              | 84                   | 14                                      | 22.8                                                              | 5                 | 1                                       | 22.8                                                              |
| Suriname                         | (286 to 447)           | (50 to 79)                              | (28.4 to 38.6)                                                    | (73 to 97)           | (13 to 17)                              | (14.4 to 29.0)                                                    | (1 to 8)          | 1                                       | (6.2 to 43.5)                                                     |
| Trinidad and Tobago              | 985                    | 72                                      | 20.8                                                              | 232                  | 15                                      | 28.0                                                              | 15                | 1                                       | 27.4                                                              |
| Trinidad and Tobago              | (781 to 1 238)         | (58 to 90)                              | (14.6 to 40.2)                                                    | (202 to 268)         | (11 to 18)                              | (12.1 to 40.1)                                                    | (0 to 22)         | 1                                       | (6.6 to 50.0)                                                     |
| Virgin Islands                   | 84                     | 11.1                                    | 33.4                                                              | 20                   | 16                                      | 33.4                                                              | 1                 | 1                                       | 33.7                                                              |
| Virgin Islands                   | (70 to 104)            | (61 to 88)                              | (10.0 to 57.4)                                                    | (18 to 23)           | (14 to 19)                              | (29.0 to 43.0)                                                    | (1 to 2)          | 1                                       | (7.9 to 50.1)                                                     |
| Central Latin America            | 144 811                | 65                                      | 2.7                                                               | 37 903               | 15                                      | 24.4                                                              | 4                 | 1                                       | 4.6                                                               |
| Central Latin America            | (126 716 to 231 666)   | (50 to 84)                              | (12.3 to 4.1)                                                     | (32 292 to 44 039)   | (13 to 18)                              | (11.5 to 0.2)                                                     | (1 513 to 3 549)  | 1                                       | (11.1 to 1.3)                                                     |
| Colombia                         | 28 327                 | 54.2                                    | 4.84                                                              | 2                    | 12                                      | 20.7                                                              | 13                | 1                                       | 43.4                                                              |
| Colombia                         | (22 705 to 35 180)     | (45 to 70)                              | (37.2 to 14.6)                                                    | (5 774 to 7 821)     | (12 to 15)                              | (27.7 to 14.5)                                                    | (77 to 136)       | 1                                       | (31.8 to 7.4)                                                     |
| Costa Rica                       | 2689                   | 58                                      | 26.6                                                              | 592                  | 12                                      | 24.0                                                              | 1                 | 1                                       | 24.3                                                              |
| Costa Rica                       | (2 144 to 3 586)       | (46 to 73)                              | (20.9 to 33.2)                                                    | (520 to 692)         | (11 to 15)                              | (20.0 to 27.4)                                                    | (24 to 59)        | 1                                       | (10.0 to 39.7)                                                    |
| El Salvador                      | 3530                   | 59                                      | 41.7                                                              | 1 083                | 16                                      | 88                                                                | 68                | 1                                       | 88                                                                |
| El Salvador                      | (2 757 to 4 466)       | (46 to 74)                              | (46.6 to 32.2)                                                    | (805 to 1 171)       | (14 to 30)                              | (51.8 to 17.8)                                                    | (43 to 107)       | 1                                       | (43.0 to 14.4)                                                    |
| Guatemala                        | 9454                   | 52                                      | 32.8                                                              | 2 129                | 24                                      | 129                                                               | 129               | 1                                       | 129                                                               |
| Guatemala                        | (7 455 to 11 720)      | (45 to 72)                              | (46.5 to 2.8)                                                     | (1 743 to 2 720)     | (13 to 21)                              | (39.5 to 8.1)                                                     | (86 to 203)       | 1                                       | (41.2 to 4.6)                                                     |
| Honduras                         | 4849                   | 53                                      | 1.024                                                             | 13                   | 15                                      | 15.9                                                              | 67                | 1                                       | 15.3                                                              |
| Honduras                         | (3 861 to 6 019)       | (42 to 68)                              | (0.4 to 12.6)                                                     | (869 to 1 119)       | (12 to 15)                              | (8.0 to 29.8)                                                     | (17 to 97)        | 1                                       | (13.1 to 6.6)                                                     |
| Mexico                           | 87 911                 | 71                                      | 6.5                                                               | 19 379               | 16                                      | 3.5                                                               | 1 261             | 1                                       | 3.6                                                               |
| Mexico                           | (64 644 to 118 936)    | (52 to 97)                              | (0.1 to 12.5)                                                     | (56 341 to 23 111)   | (14 to 19)                              | (0.3 to 6.8)                                                      | (789 to 1 889)    | 1                                       | (0.9 to 10.8)                                                     |
| Nicaragua                        | 2819                   | 57                                      | 17.7                                                              | 970                  | 16                                      | 190                                                               | 15                | 1                                       | 190                                                               |
| Nicaragua                        | (2 269 to 3 651)       | (36 to 59)                              | (12.6 to 6.7)                                                     | (619 to 1 438)       | (13 to 27)                              | (43.6 to 10.4)                                                    | (33 to 89)        | 1                                       | (45.8 to 15.3)                                                    |
| Panama                           | 2117                   | 23                                      | 23.1                                                              | 485                  | 13                                      | 485                                                               | 13                | 1                                       | 485                                                               |
| Panama                           | (1 738 to 2 739)       | (45 to 70)                              | (15.7 to 28.9)                                                    | (424 to 581)         | (11 to 14)                              | (12.7 to 22.9)                                                    | (20 to 47)        | 1                                       | (5.7 to 31.7)                                                     |
| Venezuela                        | 23 021                 | 75                                      | 25.0                                                              | 504                  | 16                                      | 26.0                                                              | 329               | 1                                       | 25.8                                                              |
| Venezuela                        | (18 413 to 28 135)     | (60 to 92)                              | (1.0 to 10.2)                                                     | (4 173 to 5 850)     | (14 to 19)                              | (19.2 to 18.8)                                                    | (206 to 486)      | 1                                       | (27.1 to 7.7)                                                     |
| Tropical Latin America           | 172 309                | 77                                      | 24.5                                                              | 40 082               | 17                                      | 23.9                                                              | 2 600             | 1                                       | 23.8                                                              |
| Tropical Latin America           | (122 762 to 235 272)   | (57 to 105)                             | (11.5 to 34.1)                                                    | (34 217 to 47 980)   | (15 to 21)                              | (17.4 to 29.1)                                                    | (3 585 to 5 904)  | 1                                       | (15.9 to 31.2)                                                    |
| Brazil                           | 1 407 485              | 245                                     | 24.2                                                              | 39 076               | 27                                      | 23.5                                                              | 17                | 1                                       | 17                                                                |
| Brazil                           | (1 230 086 to 228 851) | (170 to 105)                            | (11.4 to 34.4)                                                    | (33 336 to 46 781)   | (15 to 21)                              | (17.1 to 29.3)                                                    | (1 546 to 1 896)  | 1                                       | (15.7 to 31.5)                                                    |
| Paraguay                         | 4 981                  | 11                                      | 1.006                                                             | 1                    | 15                                      | 23.1                                                              | 46                | 1                                       | 46                                                                |
| Paraguay                         | (3 919 to 6 381)       | (6 to 12)                               | (6.7 to 26.2)                                                     | (660 to 1 195)       | (10 to 19)                              | (17.8 to 24.0)                                                    | (40 to 99)        | 1                                       | (3.5 to 37.7)                                                     |
| North Africa and Middle East     | 783 025                | 127                                     | 18.9                                                              | 159 838              | 28                                      | 10 345                                                            | 5.6               | 1                                       | 5.6                                                               |
| North Africa and Middle East     | (582 957 to 1 151 971) | (40 to 167)                             | (0.2 to 54.7)                                                     | (123 889 to 221 217) | (22 to 39)                              | (3.1 to 21.7)                                                     | (6 313 to 15 711) | 1                                       | (1.4 to 18.4)                                                     |
| Algeria                          | 783 025                | 127                                     | 18.9                                                              | 159 838              | 28                                      | 10 345                                                            | 5.6               | 1                                       | 5.6                                                               |
| Algeria                          | (582 957 to 1 151 971) | (40 to 167)                             | (0.2 to 54.7)                                                     | (123 889 to 221 217) | (22 to 39)                              | (3.1 to 21.7)                                                     | (6 313 to 15 711) | 1                                       | (1.4 to 18.4)                                                     |
| Bahrain                          | 11 507                 | 14                                      | 20.4                                                              | 3 311                | 10                                      | 646                                                               | 50                | 1                                       | 50                                                                |
| Bahrain                          | (5 418 to 19 036)      | (7 to 13)                               | (37.4 to 11.9)                                                    | (6 219 to 20 034)    | (26 to 107)                             | (36.4 to 19.8)                                                    | (162 to 1 158)    | 1                                       | (39.3 to 15.8)                                                    |
| Algeria                          | 29 269 to 45 071       | (72 to 105)                             | (5.1 to 2.9)                                                      | (7 009 to 9 354)     | (10 to 15)                              | (5.4 to 6.0)                                                      | (327 to 758)      | 1                                       | (13.8 to 11.5)                                                    |
| Bahrain                          | 1481                   | 11.3                                    | 3.3                                                               | 328                  | 21                                      | 4.3                                                               | 21                | 1                                       | 4.9                                                               |
| Bahrain                          | (1 204 to 1 853)       | (8 to 12)                               | (0.0 to 17.0)                                                     | (286 to 380)         | (8 to 10)                               | (0.9 to 0.8)                                                      | (13 to 32)        | 1                                       | (8.6 to 20.7)                                                     |
| Egypt                            | 88 892                 | 18.9                                    | 17 095                                                            | 17 095               | 19                                      | 10.0                                                              | 1 117             | 1                                       | 10.3                                                              |
| Egypt                            | (70 964 to 107 197)    | (22 to 109)                             | (12.5 to 27.0)                                                    | (14 754 to 19 908)   | (17 to 22)                              | (6.4 to 14.1)                                                     | (672 to 1 644)    | 1                                       | (1.2 to 24.8)                                                     |
| Iran                             | 81 084                 | 93.2                                    | 20 907                                                            | 26                   | 25                                      | 1318                                                              | 25                | 1                                       | 1318                                                              |
| Iran                             | (65 990 to 101 119)    | (80 to 121)                             | (50.1 to 14.8)                                                    | (17 475 to 26 507)   | (21 to 32)                              | (36.8 to 15.9)                                                    | (872 to 1 896)    | 1                                       | (17.9 to 15.9)                                                    |
| Iraq                             | 200 469                | 215.5                                   | 22 718                                                            | 215.5                | 21                                      | 4 464                                                             | 1                 | 1                                       | 4 464                                                             |
| Iraq                             | (67 097 to 238 652)    | (54 to 92)                              | (9.0 to 157.4)                                                    | (31 391 to 41 289)   | (10 to 15)                              | (18.5 to 41.2)                                                    | (768 to 2 740)    | 1                                       | (22.2 to 45.1)                                                    |
| Jordan                           | 9 071                  | 82                                      | 7.8                                                               | 1 741                | 18                                      | 11.1                                                              | 114               | 1                                       | 11.2                                                              |
| Jordan                           | (7 357 to 11 393)      | (67 to 102)                             | (12.8 to 0.0)                                                     | (1 502 to 2 049)     | (16 to 21)                              | (13.8 to 8.2)                                                     | (70 to 169)       | 1                                       | (13.1 to 25.6)                                                    |
| Kuwait                           | 4504                   | 68.7                                    | 995                                                               | 42.2                 | 23                                      | 65                                                                | 42.9              | 2                                       | 42.9                                                              |
| Kuwait                           | (3 640 to 5 719)       | (48 to 130)                             | (29.2 to 32.8)                                                    | (870 to 1 151)       | (20 to 27)                              | (43.8 to 21.1)                                                    | (40 to 95)        | 1                                       | (46.5 to 39.5)                                                    |
| Lebanon                          | 8938                   | 103                                     | 18.7                                                              | 2 251                | 24                                      | 24                                                                | 24                | 1                                       | 24                                                                |
| Lebanon                          | (7 211 to 11 180)      | (14 to 137)                             | (41.6 to 3.3)                                                     | (1 693 to 3 412)     | (12 to 46)                              | (40.7 to 6.0)                                                     | (89 to 220)       | 1                                       | (41.5 to 20.1)                                                    |
| Libya                            | 1407                   | 54.3                                    | 2 383                                                             | 1407                 | 13                                      | 36.1                                                              | 153               | 1                                       | 153                                                               |
| Libya                            | (7 642 to 16 021)      | (10 to 22)                              | (21.4 to 135.5)                                                   | (1 687 to 1 771)     | (21 to 34)                              | (19.4 to 127.1)                                                   | (91 to 244)       | 1                                       | (15.5 to 132.7)                                                   |
| Morocco                          | 28 893                 | 81                                      | 6.4                                                               | 6 439                | 18                                      | 418                                                               | 418               | 1                                       | 2.7                                                               |
| Morocco                          | (23 311 to 36 096)     | (65 to 101)                             | (6.0 to 10.2)                                                     | (5 568 to 7 439)     | (16 to 21)                              | (0.1 to 3.1)                                                      | (797 to 516)      | 1                                       | (27.9 to 12.4)                                                    |
| Palestine                        | 4685                   | 92                                      | 29.7                                                              | 1 479                | 37                                      | 5.8                                                               | 91                | 1                                       | 7.3                                                               |
| Palestine                        | (3 781 to 5 846)       | (72 to 113)                             | (53.1 to 10.4)                                                    | (268 to 2 461)       | (23 to 69)                              | (24.0 to 6.0)                                                     | (153 to 156)      | 1                                       | (27.5 to 10.7)                                                    |
| Qatar                            | 5260                   | 10.7                                    | 1 006                                                             | 10.7                 | 24                                      | 69                                                                | 24                | 1                                       | 69                                                                |
| Qatar                            | (4 243 to 6 633)       | (87 to 134)                             | (6.6 to 1.2)                                                      | (911 to 1 131)       | (27 to 37)                              | (9.1 to 3.5)                                                      | (42 to 104)       | 1                                       | (17.1 to 8.9)                                                     |
| Oman                             | 3401                   | 14.1                                    | 147                                                               | 46                   | 46                                      | 46                                                                | 46                | 1                                       | 46                                                                |
| Oman                             | (2 964 to 4 666)       | (88 to 150)                             | (6.8 to 0.3)                                                      | (647 to 872)         | (21 to 30)                              | (8.8 to 4.2)                                                      | (30 to 75)        | 1                                       | (17.4 to 7.1)                                                     |
| Saudi Arabia                     | 48 290                 | 131                                     | 11.5                                                              | 9 204                | 27                                      | 6.2                                                               | 605               | 1                                       | 1.0                                                               |
| Saudi Arabia                     | (38 557 to 61 106)     | (90 to 166)                             | (1.0 to 31.8)                                                     | (7 848 to 10 914)    | (24 to 32)                              | (5.2 to 9.1)                                                      | (24 to 906)       | 1                                       | (1.5 to 15.9)                                                     |
| Sudan                            | 31 586                 | 76                                      | 6.640                                                             | 16.1                 | 431                                     | 5                                                                 | 431               | 1                                       | 5                                                                 |
| Sudan                            | (24 224 to 41 585)     | (58 to                                  |                                                                   |                      |                                         |                                                                   |                   |                                         |                                                                   |

| Location                           | Incidence (95% UI)     |                                         |                                                                   | Prevalence (95% UI)     |                                         |                                                                   | YLDs (95% UI)     |                                         |                                                                   |
|------------------------------------|------------------------|-----------------------------------------|-------------------------------------------------------------------|-------------------------|-----------------------------------------|-------------------------------------------------------------------|-------------------|-----------------------------------------|-------------------------------------------------------------------|
|                                    | 2017 counts            | 2017 age-standardised rates per 100,000 | Percentage change in age-standardised rates between 1990 and 2017 | 2017 counts             | 2017 age-standardised rates per 100,000 | Percentage change in age-standardised rates between 1990 and 2017 | 2017 counts       | 2017 age-standardised rates per 100,000 | Percentage change in age-standardised rates between 1990 and 2017 |
| Marshall Islands                   | 43                     | 75                                      | 48.6                                                              | 9                       | 18                                      | 48.4                                                              | 1                 | 1                                       | 47.4                                                              |
|                                    | (33 to 52)             | (61 to 91)                              | (41.1 to 56.5)                                                    | (8 to 10)               | (16 to 20)                              | (43.9 to 53.1)                                                    | (0 to 1)          | (0 to 1)                                | (27.5 to 68.9)                                                    |
| Northern Mariana Islands           | 37                     | 34                                      | 9                                                                 | 18                      | 19                                      | 16.7                                                              | 1                 | 1                                       | 26.9                                                              |
|                                    | (30 to 45)             | (29 to 102)                             | (12.0 to 23.9)                                                    | (8 to 10)               | (17 to 22)                              | (13.5 to 20.0)                                                    | (0 to 1)          | (1 to 2)                                | (2 to 34.2)                                                       |
| Papua New Guinea                   | 7074                   | 24.5                                    | 423                                                               | 15                      | 423                                     | 15                                                                | 19                | 19                                      | 45                                                                |
|                                    | (5776 to 8538)         | (62 to 92)                              | (9.6 to 37.4)                                                     | (1231 to 1650)          | (15 to 21)                              | (26.7 to 42.2)                                                    | (57 to 135)       | (1 to 2)                                | (16.3 to 55.4)                                                    |
| Samoa                              | 145                    | 74                                      | 36.3                                                              | 31                      | 18                                      | 46.6                                                              | 7                 | 7                                       | 45.2                                                              |
|                                    | (113 to 175)           | (60 to 90)                              | (24 to 45.8)                                                      | (27 to 35)              | (16 to 20)                              | (39.4 to 54.6)                                                    | (1 to 3)          | (1 to 2)                                | (27.5 to 66.8)                                                    |
| Solomon Islands                    | 513                    | 61                                      | 36.3                                                              | 103                     | 20                                      | 36.7                                                              | 7                 | 7                                       | 35.3                                                              |
|                                    | (419 to 620)           | (46 to 99)                              | (31.0 to 41.8)                                                    | (89 to 118)             | (17 to 22)                              | (33.5 to 40.4)                                                    | (4 to 10)         | (1 to 2)                                | (18.8 to 54.5)                                                    |
| Tonga                              | 49                     | 67                                      | 48.0                                                              | 15                      | 16                                      | 53.3                                                              | 1                 | 1                                       | 54                                                                |
|                                    | (37 to 84)             | (55 to 82)                              | (16.9 to 57.7)                                                    | (13 to 17)              | (14 to 18)                              | (46.0 to 57.4)                                                    | (1 to 1)          | (1 to 1)                                | (30.1 to 73.3)                                                    |
| Vanuatu                            | 77                     | 80                                      | 45.8                                                              | 47                      | 15                                      | 47.9                                                              | 8                 | 8                                       | 46.7                                                              |
|                                    | (18 to 75)             | (64 to 97)                              | (18.5 to 53.2)                                                    | (61 to 54)              | (17 to 22)                              | (43.0 to 52.7)                                                    | (2 to 4)          | (1 to 2)                                | (27.0 to 68.9)                                                    |
| <b>Southeast Asia</b>              | <b>329 183</b>         | <b>49</b>                               | <b>13.0</b>                                                       | <b>81 653</b>           | <b>12</b>                               | <b>16.8</b>                                                       | <b>5 315</b>      | <b>1</b>                                | <b>16.2</b>                                                       |
|                                    | (265 746 to 403 670)   | (40 to 60)                              | (4.2 to 28.3)                                                     | (71 532 to 94 303)      | (11 to 14)                              | (6.9 to 24.7)                                                     | (3 388 to 7 693)  | (0 to 1)                                | (5.3 to 25.8)                                                     |
| Cambodia                           | 8575                   | 53                                      | 0.8                                                               | 521                     | 17                                      | 13.6                                                              | 161               | 1                                       | 13.4                                                              |
|                                    | (6 881 to 10 738)      | (42 to 66)                              | (24.6 to 18.7)                                                    | (1 961 to 3 701)        | (14 to 26)                              | (30.4 to 7.3)                                                     | (100 to 240)      | (1 to 2)                                | (4.1 to 14.0)                                                     |
| Indonesia                          | 78 421                 | 2.0                                     | 2.0                                                               | 21 528                  | 9                                       | 1432                                                              | 1                 | 1                                       | 51.5                                                              |
|                                    | (60 624 to 102 250)    | (24 to 39)                              | (9.6 to 6.5)                                                      | (19 352 to 25 469)      | (8 to 10)                               | (3.8 to 5.9)                                                      | (911 to 2 074)    | (0 to 1)                                | (5.6 to 6.8)                                                      |
| Laos                               | 2425                   | 48                                      | 58.1                                                              | 761                     | 32                                      | 48.6                                                              | 50                | 1                                       | 12.2                                                              |
|                                    | (2 766 to 4 241)       | (39 to 59)                              | (44.5 to 61.1)                                                    | (666 to 877)            | (11 to 14)                              | (20.2 to 12.4)                                                    | (30 to 74)        | (0 to 1)                                | (23.9 to 22.3)                                                    |
| Malaysia                           | 19 322                 | 61                                      | 32.3                                                              | 4 546                   | 15                                      | 28.9                                                              | 297               | 1                                       | 28.7                                                              |
|                                    | (15 445 to 24 499)     | (49 to 77)                              | (23.3 to 41.2)                                                    | (3 980 to 5 187)        | (13 to 17)                              | (23.3 to 36.7)                                                    | (163 to 444)      | (1 to 1)                                | (10.6 to 40.2)                                                    |
| Maldives                           | 243                    | 25                                      | 24.8                                                              | 54                      | 16                                      | 21.5                                                              | 8                 | 8                                       | 23.6                                                              |
|                                    | (185 to 301)           | (40 to 60)                              | (16.8 to 31.8)                                                    | (48 to 63)              | (11 to 13)                              | (16.1 to 27.2)                                                    | (2 to 5)          | (0 to 1)                                | (6.9 to 40.0)                                                     |
| Mauritius                          | 632                    | 40                                      | 54.4                                                              | 168                     | 11                                      | 12.4                                                              | 11                | 11                                      | 11.5                                                              |
|                                    | (492 to 754)           | (40 to 60)                              | (46.2 to 63.7)                                                    | (151 to 189)            | (10 to 13)                              | (7.8 to 37.6)                                                     | (7 to 16)         | (1 to 2)                                | (32.1 to 73.0)                                                    |
| Myanmar                            | 53 601                 | 163.3                                   | 9 905                                                             | 9 905                   | 81.9                                    | 81.9                                                              | 447               | 19                                      | 44.7                                                              |
|                                    | (35 733 to 81 824)     | (66 to 151)                             | (79.8 to 331.5)                                                   | (7 584 to 13 004)       | (14 to 25)                              | (42.2 to 145.7)                                                   | (197 to 1 029)    | (1 to 2)                                | (18.0 to 151.8)                                                   |
| Philippines                        | 57 754                 | 55                                      | 12.85                                                             | 12 395                  | 13                                      | 27.5                                                              | 809               | 1                                       | 25.8                                                              |
|                                    | (46 012 to 71 700)     | (44 to 68)                              | (5.6 to 30.8)                                                     | (10 710 to 14 423)      | (11 to 15)                              | (14.3 to 37.1)                                                    | (508 to 1 203)    | (1 to 1)                                | (6.3 to 38.9)                                                     |
| Sri Lanka                          | 10 769                 | 39                                      | 4 057                                                             | 258                     | 19                                      | 22.1                                                              | 258               | 1                                       | 24.7                                                              |
|                                    | (8 726 to 13 146)      | (31 to 61)                              | (48.0 to 31.0)                                                    | (1 018 to 1 366)        | (11 to 17)                              | (57.8 to 15.2)                                                    | (116 to 389)      | (1 to 1)                                | (18.2 to 76.4)                                                    |
| Seychelles                         | 93                     | 15                                      | 46.6                                                              | 15                      | 14                                      | 14                                                                | 1                 | 1                                       | 1                                                                 |
|                                    | (47 to 72)             | (46 to 69)                              | (18.6 to 55.0)                                                    | (13 to 16)              | (89 to 49.3)                            | (1 to 1)                                                          | (1 to 1)          | (26.0 to 64.3)                          |                                                                   |
| Thailand                           | 43 907                 | 62                                      | 17.0                                                              | 13 380                  | 15                                      | 35                                                                | 801               | 1                                       | 15.7                                                              |
|                                    | (34 746 to 54 521)     | (50 to 78)                              | (10.4 to 24.6)                                                    | (11 049 to 13 978)      | (13 to 17)                              | (11.8 to 19.8)                                                    | (507 to 1 174)    | (1 to 1)                                | (10.3 to 32.7)                                                    |
| Vietnam                            | 551                    | 43                                      | 61.0                                                              | 226                     | 23                                      | 15.2                                                              | 14                | 1                                       | 17.9                                                              |
|                                    | (446 to 658)           | (35 to 57)                              | (40 to 23.4)                                                      | (179 to 296)            | (11 to 16)                              | (46.1 to 6.5)                                                     | (8 to 35)         | (1 to 1)                                | (34.6 to 2.4)                                                     |
| Yemen                              | 51 452                 | 52                                      | 12.1                                                              | 12 592                  | 13                                      | 38.5                                                              | 822               | 1                                       | 36.0                                                              |
|                                    | (41 604 to 63 689)     | (42 to 65)                              | (8.8 to 50.0)                                                     | (11 136 to 14 335)      | (11 to 14)                              | (34.4 to 42.0)                                                    | (508 to 1 237)    | (1 to 1)                                | (20.1 to 55.3)                                                    |
| <b>Sub-Saharan Africa</b>          | <b>353 044</b>         | <b>28.5</b>                             | <b>148 831</b>                                                    | <b>85</b>               | <b>22</b>                               | <b>105.91</b>                                                     | <b>10 951</b>     | <b>1</b>                                | <b>1.8</b>                                                        |
|                                    | (699 830 to 1 036 091) | (70 to 104)                             | (44.1 to -11.8)                                                   | (141 460 to 206 341)    | (18 to 26)                              | (25.9 to -6.9)                                                    | (6 918 to 15 759) | (1 to 2)                                | (26.3 to -4.7)                                                    |
| <b>Central sub-Saharan Africa</b>  | <b>99 549</b>          | <b>4.0</b>                              | <b>20 296</b>                                                     | <b>22</b>               | <b>11</b>                               | <b>1.317</b>                                                      | <b>1 317</b>      | <b>1</b>                                | <b>1.8</b>                                                        |
|                                    | (80 456 to 122 122)    | (68 to 104)                             | (8.7 to 0.6)                                                      | (16 824 to 25 184)      | (18 to 28)                              | (4.8 to 1.9)                                                      | (838 to 18 04)    | (1 to 2)                                | (8.8 to 38.4)                                                     |
| Angola                             | 21 094                 | 79                                      | 4.85                                                              | 25                      | 25                                      | 29.6                                                              | 314               | 2                                       | 30.7                                                              |
|                                    | (17 145 to 25 261)     | (64 to 99)                              | (4.7 to -26.7)                                                    | (1 891 to 8 119)        | (20 to 27)                              | (44.1 to -19.8)                                                   | (159 to 451)      | (1 to 2)                                | (48.8 to -16.9)                                                   |
| Central African Republic           | 7943                   | 115.7                                   | 79.4                                                              | 1 777                   | 31                                      | 84                                                                | 31                | 31                                      | 84                                                                |
|                                    | (4 845 to 14 864)      | (89 to 335)                             | (68.8 to 2 041)                                                   | (868 to 2 041)          | (22 to 47)                              | (30.1 to 169.4)                                                   | (46 to 148)       | (1 to 2)                                | (27.1 to 180.7)                                                   |
| Congo (Brazzaville)                | 8 802                  | 71.1                                    | 9.08                                                              | 60                      | 60                                      | 23                                                                | 23                | 23                                      | 1.0                                                               |
|                                    | (5 085 to 6 680)       | (64 to 98)                              | (11.0 to -3.7)                                                    | (752 to 2 252)          | (19 to 31)                              | (5.5 to 49.0)                                                     | (87 to 87)        | (1 to 1)                                | (13.0 to 51.2)                                                    |
| DR Congo                           | 64 193                 | 13.2                                    | 12 498                                                            | 20                      | 20                                      | 16.1                                                              | 827               | 1                                       | 16.4                                                              |
|                                    | (51 954 to 78 784)     | (86 to 99)                              | (5.8 to 28.4)                                                     | (10 544 to 15 927)      | (17 to 25)                              | (6.0 to 42.0)                                                     | (518 to 1 197)    | (1 to 2)                                | (10.4 to 53.5)                                                    |
| Equatorial Guinea                  | 1 067                  | 82                                      | 193                                                               | 193                     | 19                                      | 0.4                                                               | 1                 | 1                                       | 0.5                                                               |
|                                    | (861 to 1 321)         | (68 to 102)                             | (9.9 to 11.1)                                                     | (166 to 228)            | (17 to 22)                              | (2.4 to 9.2)                                                      | (8 to 19)         | (1 to 1)                                | (10.7 to 13.9)                                                    |
| Gabon                              | 1 452                  | 87                                      | 14.2                                                              | 306                     | 25                                      | 14.5                                                              | 25                | 25                                      | 17.1                                                              |
|                                    | (1 167 to 1 800)       | (70 to 108)                             | (7.2 to -11.1)                                                    | (267 to 352)            | (18 to 24)                              | (16.3 to -12.7)                                                   | (12 to 29)        | (1 to 2)                                | (23.8 to -2.9)                                                    |
| <b>Eastern sub-Saharan Africa</b>  | <b>304 278</b>         | <b>62.2</b>                             | <b>24 993</b>                                                     | <b>61 127 to 97 449</b> | <b>40.3 to 9.9</b>                      | <b>(2 087 to 7 018)</b>                                           | <b>1 202</b>      | <b>1</b>                                | <b>(41.4 to 4.5)</b>                                              |
|                                    | (297 463 to 456 040)   | (79 to 120)                             | (41.9 to -20.5)                                                   | (61 127 to 97 449)      | (40.3 to 9.9)                           | (2 087 to 7 018)                                                  | (1 202)           | (1 to 2)                                | (41.4 to 4.5)                                                     |
| Burundi                            | 9 575                  | 95                                      | 10.4                                                              | 3 278                   | 42                                      | 74.5                                                              | 208               | 68.5                                    | 68.5                                                              |
|                                    | (7 802 to 11 793)      | (73 to 113)                             | (15.3 to -2.8)                                                    | (2 026 to 5 281)        | (25 to 83)                              | (5.4 to 24.2)                                                     | (115 to 364)      | (1 to 5)                                | (23.8 to 236.2)                                                   |
| Comoros                            | 646                    | 92                                      | 132                                                               | 132                     | 21                                      | 18.1                                                              | 1                 | 1                                       | 17.6                                                              |
|                                    | (539 to 804)           | (74 to 114)                             | (43.8 to -12.8)                                                   | (115 to 153)            | (19 to 24)                              | (20.3 to -16.0)                                                   | (5 to 13)         | (1 to 2)                                | (16.2 to 48.0)                                                    |
| Djibouti                           | 1 059                  | 98                                      | 27.1                                                              | 221                     | 24                                      | 16.4                                                              | 14                | 14                                      | 17.1                                                              |
|                                    | (860 to 1 310)         | (80 to 122)                             | (44.0 to -16.1)                                                   | (192 to 258)            | (21 to 27)                              | (26.9 to -9.6)                                                    | (9 to 21)         | (1 to 2)                                | (13.0 to 34.8)                                                    |
| Eritrea                            | 8 182                  | 91                                      | 94.0                                                              | 1 974                   | 13                                      | 123                                                               | 123               | 123                                     | 123                                                               |
|                                    | (4 181 to 6 410)       | (74 to 113)                             | (97.4 to 84.1)                                                    | (1 159 to 1 952)        | (27 to 107)                             | (48.4 to -61.9)                                                   | (67 to 227)       | (2 to 6)                                | (40.1 to -61.7)                                                   |
| Ethiopia                           | 89 633                 | 47.6                                    | 24                                                                | 18 544                  | 24                                      | 1 205                                                             | 1 205             | 1 205                                   | 44.6                                                              |
|                                    | (72 465 to 110 142)    | (73 to 111)                             | (40 to -41.7)                                                     | (14 981 to 24 682)      | (20 to 31)                              | (64.1 to 20.8)                                                    | (760 to 1 744)    | (1 to 2)                                | (28.4 to 24.8)                                                    |
| Kenya                              | 48 962                 | 13.0                                    | 9 493                                                             | 25                      | 25                                      | 11.4                                                              | 621               | 2                                       | 11.4                                                              |
|                                    | (37 752 to 63 083)     | (81 to 139)                             | (9.4 to 17.9)                                                     | (8 508 to 31 907)       | (22 to 29)                              | (9 to 14.0)                                                       | (382 to 913)      | (1 to 2)                                | (8.2 to 16.7)                                                     |
| Madagascar                         | 23 008                 | 10.6                                    | 1 771                                                             | 271                     | 21                                      | 280                                                               | 21                | 21                                      | 280                                                               |
|                                    | (8 780 to 28 693)      | (75 to 115)                             | (14.3 to 4.8)                                                     | (8 555 to 5 005)        | (19 to 24)                              | (15.2 to -10.4)                                                   | (170 to 417)      | (1 to 2)                                | (23.6 to 4.1)                                                     |
| Malawi                             | 12 148                 | 11.1                                    | 3 438                                                             | 3 438                   | 18                                      | 4.2                                                               | 159               | 1                                       | 15.9                                                              |
|                                    | (10 473 to 16 497)     | (63 to 100)                             | (5.2 to 10.0)                                                     | (8 055 to 2 868)        | (16 to 21)                              | (6.4 to -2.3)                                                     | (86 to 294)       | (1 to 2)                                | (14.8 to 8.7)                                                     |
| Mozambique                         | 25 417                 | 91                                      | 22.0                                                              | 5 286                   | 26                                      | 23.8                                                              | 342               | 23.7                                    | 23.7                                                              |
|                                    | (20 459 to 31 590)     | (72 to 114)                             | (43.3 to -5.5)                                                    | (4 311 to 8 111)        | (22 to 36)                              | (37.7 to -9.8)                                                    | (213 to 655)      | (1 to 2)                                | (23.8 to 4.7)                                                     |
| Rwanda                             | 10 532                 | 87                                      | 4 009                                                             | 4 009                   | 25                                      | 30.1                                                              | 252               | 9                                       | 23.8                                                              |
|                                    | (8 492 to 13 105)      | (69 to 109)                             | (7.6 to 33.9)                                                     | (2 364 to 5 000)        | (25 to 95)                              | (28.8 to 137.4)                                                   | (137 to 478)      | (1 to 5)                                | (30.3 to 146.6)                                                   |
| Somalia                            | 136                    | 136                                     | 136                                                               | 136                     | 8.7                                     | 310                                                               | 310               | 310                                     | 310                                                               |
|                                    | (9 473 to 49 033)      | (71 to 293)                             | (8.8 to 7.6)                                                      | (8 397 to 1 384)        | (27 to 32)                              | (3.3 to 13.5)                                                     | (182 to 517)      | (1 to 4)                                | (18.3 to 146.6)                                                   |
| South Sudan                        | 20 447                 | 214.7                                   | 45.6                                                              | 270                     | 41                                      | 214                                                               | 214               | 214                                     | 214                                                               |
|                                    | (13 779 to 36 318)     | (12 to 373)                             | (24.1 to 69.9)                                                    | (2 778 to 5 060)        | (50 to 61)                              | (20.0 to 74.7)                                                    | (130 to 369)      | (2 to 4)                                | (17.0 to 77.7)                                                    |
| Tanzania                           | 45 517                 | 80                                      | 8 296                                                             | 20                      | 20                                      | 544                                                               | 544               | 544                                     | 544                                                               |
|                                    | (36 126 to 56 111)     | (69 to 107)                             | (9.9 to 17.2)                                                     | (2 074 to 3 802)        | (17 to 23)                              | (2.2 to 5.1)                                                      | (130 to 816)      | (1 to 2)                                | (10.4 to 12.7)                                                    |
| Uganda                             | 31 943                 | 85                                      | 5.4                                                               | 6 404                   | 24                                      | 13.5                                                              | 416               | 2                                       | 12.7                                                              |
|                                    | (25 696 to 40 063)     | (68 to 106)                             | (21.2 to 4.4)                                                     | (5 280 to 8 041)        | (19 to 32)                              | (27.2 to 3.4)                                                     | (239 to 597)      | (1 to 2)                                | (29.0 to 6.2)                                                     |
| Zambia                             | 14 235                 | 24.9                                    | 2 417                                                             | 2 417                   | 20                                      | 117                                                               | 117               | 117                                     | 117                                                               |
|                                    | (11 407 to 17 917)     | (89 to 110)                             | (13.6 to 4.4)                                                     | (2 738 to 2 093)        | (16 to 23)                              | (12.6 to 8.2)                                                     | (106 to 257)      | (1 to 2)                                | (21.1 to 8.8)                                                     |
| <b>Southern sub-Saharan Africa</b> | <b>67 864</b>          | <b>62.7</b>                             | <b>24 993</b>                                                     | <b>61 127 to 97 449</b> | <b>40.3 to 9.9</b>                      | <b>(2 087 to 7 018)</b>                                           | <b>1 202</b>      | <b>1</b>                                | <b>(41.4 to 4.5)</b>                                              |
|                                    | (65 412 to 82 604)     | (71 to 105)                             | (16.3 to -8.9)                                                    | (21 692 to 16 689)      | (18 to 26)                              | (16.3 to -12.2)                                                   | (599 to 1 364)    | (1 to 2)                                | (38.2 to -39.1)                                                   |
| Botswana                           | 1 801                  | 79                                      | 0.4                                                               | 369                     | 18                                      | 0.8                                                               | 24                | 24                                      | 0.8                                                               |
|                                    | (1 465 to 2 200)       | (66 to 96)                              | (4.5 to 0.3)                                                      | (221 to 425)            | (16 to 21)                              | (3.0 to 1.3)                                                      | (15 to 35)        | (1 to 2)                                | (12.2 to 18.0)                                                    |
| Lesotho                            | 1 760                  | 89                                      | 20.2                                                              | 357                     | 25                                      | 20.3                                                              | 25                | 25                                      | 20.1                                                              |
|                                    | (1 443 to 2 127)       | (73 to 109)                             | (6.1 to 24.2)                                                     | (131 to 414)            | (18 to 23)                              | (18.2 to 23.2)                                                    | (15 to 34)        | (1 to 2)                                | (6.4 to 35.1)                                                     |
| Namibia                            | 2 004                  | 90                                      | 5.1                                                               | 470                     | 24                                      | 30.5                                                              | 30                | 30                                      | 30.6                                                              |
|                                    | (1 682 to 2 482)       | (71 to 105)                             | (8.5 to -1.9)                                                     | (392 to 596)            | (20 to 31)                              | (32.7 to -10.3)                                                   | (19 to 44)        | (1 to 2)                                | (35.7 to -2.7)                                                    |
| South Africa                       | 50 482                 | 77                                      | 15.1                                                              | 11 039                  | 21                                      | 716                                                               | 716               | 716                                     | 716                                                               |
|                                    | (40 984 to 61 568)     | (74 to 110)                             | (22.5 to -13.9)                                                   | (9 673 to 12 688)       | (18 to 24)                              | (22.0 to -17.1)                                                   | (453 to 1 034)    | (1 to 2)                                | (23.9 to -15.0)                                                   |
| Swaziland                          | 1 017                  | 90                                      | 6.3                                                               | 197                     | 21                                      | 5.0                                                               | 13                | 13                                      | 4.8                                                               |
|                                    | (837 to 1 238)         | (77 to 109)                             | (1.2 to 9.5)                                                      | (170 to 228)            | (16 to 20)                              | (1.1 to 7.0)                                                      | (8 to 19)         | (1 to 2)                                | (17.2 to 18.2)                                                    |
| Zimbabwe                           | 10 853                 | 76                                      | 11.0                                                              | 2 083                   | 18                                      | 13.0                                                              | 137               | 1                                       | 13.1                                                              |
|                                    | (8 901 to 13 211)      | (62 to 92)                              | (7.6 to 14.5)                                                     | (1 802 to 2 424)        | (16 to 20)                              | (10.8 to 15.3)                                                    | (84 to 201)       | (1 to 1)                                | (9.6 to 28.5)                                                     |
| <b>Western sub-Saharan Africa</b>  | <b>318 658</b>         | <b>76</b>                               | <b>9.8</b>                                                        | <b>50 522</b>           | <b>17</b>                               | <b>3.897</b>                                                      | <b>3 897</b>      | <b>1</b>                                | <b>4.9</b>                                                        |
|                                    | (259 892 to 382 659)   | (62 to 91)                              | (8.7 to 0.6)                                                      | (50 525 to 68 115)      | (15 to 29)                              | (4.5 to 2.6)                                                      | (2 360 to 5 549)  | (1 to 2)                                | (7.5 to 6.7)                                                      |
| Benin                              | 8 479                  | 76                                      | 1.75                                                              | 1 375                   | 18                                      | 5.5                                                               | 104               | 1                                       | 10.4                                                              |
|                                    | (6 995 to 10 339)      | (62 to 93)                              | (5.9 to 0.2)                                                      | (1 352 to 1 842)        | (16 to 20)                              | (7.1 to -3.8)                                                     | (64 to            |                                         |                                                                   |
